# Supplementary material for: MicroRNA-33a-5p Modulates Japanese Encephalitis Virus Replication by Targeting Eukaryotic Translation Elongation Factor 1A1
Source: PubMed Central journal article supplement (PMC4794666; doi:10.1128/jvi.03242-15), 2016-03-11
Supplement: JVI.03242-15_zjv999091514so1.pdf [file JVI.03242-15_zjv999091514so1.pdf]

con (control group) ;P3 (JEV P3 group)

| pairwise              | miR-name               | RNA-con-total<br>-reads | RNA-P3-total<br>-reads | RNA-con-expressed | RNA-P3-expressed | RNA-con-std   | RNA-P3-std     | fold-change (log2<br>RNA-P3/RNA-con) | p-value          | sig-lable |
|-----------------------|------------------------|-------------------------|------------------------|-------------------|------------------|---------------|----------------|--------------------------------------|------------------|-----------|
| RNA-con-RNA-P3        | hsa-miR-191-3p         | 15617308                | 17985385               | 26                | 2                | 1.6648        | 0.1112         | -3.90412018                          | 2.56E-07         | **        |
| RNA-con-RNA-P3        | hsa-miR-4448           | 15617308                | 17985385               | 21                | 2                | 1.3447        | 0.1112         | -3.59605565                          | 8.14E-06         | **        |
| RNA-con-RNA-P3        | hsa-miR-145-3p         | 15617308                | 17985385               | 16                | 2                | 1.0245        | 0.1112         | -3.20369129                          | 0.0002376        | **        |
| RNA-con-RNA-P3        | hsa-miR-143-5p         | 15617308                | 17985385               | 107               | 14               | 6.8514        | 0.7784         | -3.1378152                           | 3.50E-22         | **        |
| RNA-con-RNA-P3        | hsa-miR-3138           | 15617308                | 17985385               | 30                | 4                | 1.9209        | 0.2224         | -3.11055372                          | 4.64E-07         | **        |
| RNA-con-RNA-P3        | hsa-miR-1299           | 15617308                | 17985385               | 37                | 5                | 2.3692        | 0.278          | -3.0912432                           | 2.15E-08         | **        |
| RNA-con-RNA-P3        | hsa-miR-149-3p         | 15617308                | 17985385               | 37                | 5                | 2.3692        | 0.278          | -3.0912432                           | 2.15E-08         | **        |
| RNA-con-RNA-P3        | hsa-miR-551b-5p        | 15617308                | 17985385               | 71                | 11               | 4.5462        | 0.6116         | -2.89400084                          | 4.20E-14         | **        |
| RNA-con-RNA-P3        | hsa-miR-204-3p         | 15617308                | 17985385               | 542               | 91               | 34.705        | 5.0597         | -2.77802393                          | 7.65E-94         | **        |
| RNA-con-RNA-P3        | hsa-miR-642a-3p        | 15617308                | 17985385               | 55                | 10               | 3.5217        | 0.556          | -2.66311523                          | 2.22E-10         | **        |
| RNA-con-RNA-P3        | hsa-miR-23b-5p         | 15617308                | 17985385               | 4083              | 747              | 261.44        | 41.5337        | -2.65412945                          | 0                | **        |
| RNA-con-RNA-P3        | hsa-miR-1228-5p        | 15617308                | 17985385               | 19                | 4                | 1.2166        | 0.2224         | -2.45162622                          | 0.0004576        | **        |
| RNA-con-RNA-P3        | hsa-miR-450a-3p        | 15617308                | 17985385               | 50                | 11               | 3.2016        | 0.6116         | -2.38813276                          | 1.37E-08         | **        |
| RNA-con-RNA-P3        | hsa-miR-758-5p         | 15617308                | 17985385               | 203               | 46               | 12.998        | 2.5576         | -2.3454715                           | 4.67E-30         | **        |
| RNA-con-RNA-P3        | hsa-miR-1268a          | 15617308                | 17985385               | 4468              | 1053             | 286.09        | 58.5475        | -2.28880372                          | 0                | **        |
| RNA-con-RNA-P3        | hsa-miR-1323           | 15617308                | 17985385               | 144               | 34               | 9.2205        | 1.8904         | -2.28615345                          | 3.88E-21         | **        |
| RNA-con-RNA-P3        | hsa-miR-944            | 15617308                | 17985385               | 59                | 14               | 3.7779        | 0.7784         | -2.2790009                           | 1.94E-09         | **        |
| RNA-con-RNA-P3        | hsa-miR-1268b          | 15617308                | 17985385               | 4709              | 1152             | 301.52        | 64.052         | -2.23495923                          | 0                | **        |
| RNA-con-RNA-P3        | hsa-miR-769-5p         | 15617308                | 17985385               | 20                | 5                | 1.2806        | 0.278          | -2.20366313                          | 0.0007309        | **        |
| <b>RNA-con-RNA-P3</b> | <b>hsa-miR-33a-5p*</b> | <b>15617308</b>         | <b>17985385</b>        | <b>2358</b>       | <b>604</b>       | <b>150.99</b> | <b>33.5828</b> | <b>-2.16862322</b>                   | <b>2.76E-300</b> | <b>**</b> |
| RNA-con-RNA-P3        | hsa-miR-181c-3p        | 15617308                | 17985385               | 37                | 10               | 2.3692        | 0.556          | -2.0912432                           | 7.28E-06         | **        |
| RNA-con-RNA-P3        | hsa-miR-181b-3p        | 15617308                | 17985385               | 70                | 19               | 4.4822        | 1.0564         | -2.08505082                          | 6.09E-10         | **        |
| RNA-con-RNA-P3        | hsa-miR-33b-3p         | 15617308                | 17985385               | 25                | 7                | 1.6008        | 0.3892         | -2.04020946                          | 0.0003053        | **        |
| RNA-con-RNA-P3        | hsa-let-7e-5p          | 15617308                | 17985385               | 4E+05             | 1E+05            | 27260         | 6713.84        | -2.02159642                          | 0                | **        |
| RNA-con-RNA-P3        | hsa-miR-3928           | 15617308                | 17985385               | 152               | 44               | 9.7328        | 2.4464         | -1.9921946                           | 6.91E-19         | **        |
| RNA-con-RNA-P3        | hsa-miR-301a-5p        | 15617308                | 17985385               | 230               | 71               | 14.727        | 3.9476         | -1.89944524                          | 3.57E-26         | **        |
| RNA-con-RNA-P3        | hsa-miR-3130-3p        | 15617308                | 17985385               | 45                | 14               | 2.8814        | 0.7784         | -1.88818634                          | 3.62E-06         | **        |
| RNA-con-RNA-P3        | hsa-miR-1908           | 15617308                | 17985385               | 16                | 5                | 1.0245        | 0.278          | -1.8817632                           | 0.0065815        | **        |
| RNA-con-RNA-P3        | hsa-miR-3141           | 15617308                | 17985385               | 151               | 48               | 9.6688        | 2.6688         | -1.85714565                          | 3.25E-17         | **        |
| RNA-con-RNA-P3        | hsa-miR-185-3p         | 15617308                | 17985385               | 142               | 47               | 9.0925        | 2.6132         | -1.79885948                          | 1.22E-15         | **        |
| RNA-con-RNA-P3        | hsa-miR-504            | 15617308                | 17985385               | 54                | 18               | 3.4577        | 1.0008         | -1.78865901                          | 9.79E-07         | **        |
| RNA-con-RNA-P3        | hsa-miR-744-5p         | 15617308                | 17985385               | 5983              | 2032             | 383.1         | 112.981        | -1.76164822                          | 0                | **        |
| RNA-con-RNA-P3        | hsa-miR-124-3p         | 15617308                | 17985385               | 50                | 17               | 3.2016        | 0.9452         | -1.76010154                          | 3.22E-06         | **        |

|                |                 |          |          |       |       |        |         |             |           |    |
|----------------|-----------------|----------|----------|-------|-------|--------|---------|-------------|-----------|----|
| RNA-con-RNA-P3 | hsa-miR-184     | 15617308 | 17985385 | 20    | 7     | 1.2806 | 0.3892  | -1.7182363  | 0.0041404 | ** |
| RNA-con-RNA-P3 | hsa-miR-3190-3p | 15617308 | 17985385 | 20    | 7     | 1.2806 | 0.3892  | -1.7182363  | 0.0041404 | ** |
| RNA-con-RNA-P3 | hsa-miR-548ai   | 15617308 | 17985385 | 20    | 7     | 1.2806 | 0.3892  | -1.7182363  | 0.0041404 | ** |
| RNA-con-RNA-P3 | hsa-miR-570-5p  | 15617308 | 17985385 | 20    | 7     | 1.2806 | 0.3892  | -1.7182363  | 0.0041404 | ** |
| RNA-con-RNA-P3 | hsa-miR-4450    | 15617308 | 17985385 | 17    | 6     | 1.0885 | 0.3336  | -1.70615021 | 0.0087133 | ** |
| RNA-con-RNA-P3 | hsa-miR-185-5p  | 15617308 | 17985385 | 31747 | 11244 | 2032.8 | 625.174 | -1.70114408 | 0         | ** |
| RNA-con-RNA-P3 | hsa-miR-877-5p  | 15617308 | 17985385 | 140   | 50    | 8.9644 | 2.78    | -1.68912214 | 2.95E-14  | ** |
| RNA-con-RNA-P3 | hsa-miR-654-3p  | 15617308 | 17985385 | 131   | 48    | 8.3881 | 2.6688  | -1.65215287 | 4.65E-13  | ** |
| RNA-con-RNA-P3 | hsa-miR-940     | 15617308 | 17985385 | 30    | 11    | 1.9209 | 0.6116  | -1.6511221  | 0.0005979 | ** |
| RNA-con-RNA-P3 | hsa-miR-128     | 15617308 | 17985385 | 12874 | 4777  | 824.34 | 265.605 | -1.63396306 | 0         | ** |
| RNA-con-RNA-P3 | hsa-miR-548j    | 15617308 | 17985385 | 35    | 13    | 2.2411 | 0.7228  | -1.63253861 | 0.0002304 | ** |
| RNA-con-RNA-P3 | hsa-miR-628-5p  | 15617308 | 17985385 | 50    | 19    | 3.2016 | 1.0564  | -1.59963687 | 1.36E-05  | ** |
| RNA-con-RNA-P3 | hsa-miR-1307-5p | 15617308 | 17985385 | 388   | 148   | 24.844 | 8.2289  | -1.59413759 | 5.55E-34  | ** |
| RNA-con-RNA-P3 | hsa-miR-152     | 15617308 | 17985385 | 3682  | 1406  | 235.76 | 78.1746 | -1.59257222 | 9.73E-307 | ** |
| RNA-con-RNA-P3 | hsa-miR-99a-3p  | 15617308 | 17985385 | 231   | 89    | 14.791 | 4.9485  | -1.57968567 | 1.28E-20  | ** |
| RNA-con-RNA-P3 | hsa-miR-380-5p  | 15617308 | 17985385 | 18    | 7     | 1.1526 | 0.3892  | -1.56630831 | 0.0110017 | *  |
| RNA-con-RNA-P3 | hsa-miR-5010-5p | 15617308 | 17985385 | 18    | 7     | 1.1526 | 0.3892  | -1.56630831 | 0.0110017 | *  |
| RNA-con-RNA-P3 | hsa-miR-217     | 15617308 | 17985385 | 95    | 37    | 6.083  | 2.0572  | -1.56410095 | 3.31E-09  | ** |
| RNA-con-RNA-P3 | hsa-miR-4435    | 15617308 | 17985385 | 33    | 13    | 2.113  | 0.7228  | -1.54762436 | 0.0005843 | ** |
| RNA-con-RNA-P3 | hsa-miR-32-5p   | 15617308 | 17985385 | 147   | 58    | 9.4126 | 3.2248  | -1.5453836  | 2.84E-13  | ** |
| RNA-con-RNA-P3 | hsa-miR-1277-5p | 15617308 | 17985385 | 30    | 12    | 1.9209 | 0.6672  | -1.52559122 | 0.0011888 | ** |
| RNA-con-RNA-P3 | hsa-miR-3690    | 15617308 | 17985385 | 20    | 8     | 1.2806 | 0.4448  | -1.52559122 | 0.0084434 | ** |
| RNA-con-RNA-P3 | hsa-miR-4425    | 15617308 | 17985385 | 115   | 47    | 7.3636 | 2.6132  | -1.49459372 | 3.04E-10  | ** |
| RNA-con-RNA-P3 | hsa-miR-99b-3p  | 15617308 | 17985385 | 1416  | 580   | 90.669 | 32.2484 | -1.49137543 | 2.43E-108 | ** |
| RNA-con-RNA-P3 | hsa-miR-105-3p  | 15617308 | 17985385 | 36    | 15    | 2.3051 | 0.834   | -1.46671005 | 0.0005512 | ** |
| RNA-con-RNA-P3 | hsa-miR-628-3p  | 15617308 | 17985385 | 64    | 27    | 4.098  | 1.5012  | -1.44880379 | 4.65E-06  | ** |
| RNA-con-RNA-P3 | hsa-miR-320a    | 15617308 | 17985385 | 1E+05 | 63157 | 9298   | 3511.57 | -1.40479559 | 0         | ** |
| RNA-con-RNA-P3 | hsa-let-7c      | 15617308 | 17985385 | 6E+05 | 3E+05 | 41079  | 15543.4 | -1.40208248 | 0         | ** |
| RNA-con-RNA-P3 | hsa-miR-340-5p  | 15617308 | 17985385 | 2301  | 1012  | 147.34 | 56.2679 | -1.38873085 | 3.82E-157 | ** |
| RNA-con-RNA-P3 | hsa-miR-1       | 15617308 | 17985385 | 1756  | 773   | 112.44 | 42.9793 | -1.38743377 | 3.21E-120 | ** |
| RNA-con-RNA-P3 | hsa-miR-99a-5p  | 15617308 | 17985385 | 5940  | 2622  | 380.35 | 145.785 | -1.3834747  | 0         | ** |
| RNA-con-RNA-P3 | hsa-miR-660-5p  | 15617308 | 17985385 | 185   | 82    | 11.846 | 4.5593  | -1.37749139 | 5.66E-14  | ** |
| RNA-con-RNA-P3 | hsa-miR-1306-3p | 15617308 | 17985385 | 153   | 68    | 9.7968 | 3.7808  | -1.37361905 | 9.24E-12  | ** |
| RNA-con-RNA-P3 | hsa-miR-873-5p  | 15617308 | 17985385 | 199   | 89    | 12.742 | 4.9485  | -1.36456253 | 9.99E-15  | ** |
| RNA-con-RNA-P3 | hsa-miR-199a-3p | 15617308 | 17985385 | 276   | 124   | 17.673 | 6.8945  | -1.35800463 | 1.04E-19  | ** |
| RNA-con-RNA-P3 | hsa-miR-199b-3p | 15617308 | 17985385 | 276   | 124   | 17.673 | 6.8945  | -1.35800463 | 1.04E-19  | ** |
| RNA-con-RNA-P3 | hsa-miR-766-5p  | 15617308 | 17985385 | 82    | 37    | 5.2506 | 2.0572  | -1.35180023 | 8.54E-07  | ** |
| RNA-con-RNA-P3 | hsa-let-7b-5p   | 15617308 | 17985385 | 3E+06 | 1E+06 | 168958 | 66450.7 | -1.34630662 | 0         | ** |
| RNA-con-RNA-P3 | hsa-miR-299-3p  | 15617308 | 17985385 | 75    | 34    | 4.8024 | 1.8904  | -1.34506404 | 2.76E-06  | ** |
| RNA-con-RNA-P3 | hsa-miR-1287    | 15617308 | 17985385 | 125   | 58    | 8.0039 | 3.2248  | -1.31149345 | 2.78E-09  | ** |
| RNA-con-RNA-P3 | hsa-miR-1285-3p | 15617308 | 17985385 | 209   | 97    | 13.383 | 5.3933  | -1.31111824 | 1.46E-14  | ** |

|                |                  |          |          |       |       |        |         |             |           |    |
|----------------|------------------|----------|----------|-------|-------|--------|---------|-------------|-----------|----|
| RNA-con-RNA-P3 | hsa-miR-548e     | 15617308 | 17985385 | 90    | 42    | 5.7628 | 2.3352  | -1.30322384 | 5.31E-07  | ** |
| RNA-con-RNA-P3 | hsa-miR-27b-3p   | 15617308 | 17985385 | 3329  | 1585  | 213.16 | 88.1271 | -1.27428519 | 1.99E-198 | ** |
| RNA-con-RNA-P3 | hsa-miR-876-5p   | 15617308 | 17985385 | 23    | 11    | 1.4727 | 0.6116  | -1.26780326 | 0.0138535 | *  |
| RNA-con-RNA-P3 | hsa-let-7d-5p    | 15617308 | 17985385 | 72220 | 34587 | 4624.4 | 1923.06 | -1.2658478  | 0         | ** |
| RNA-con-RNA-P3 | hsa-miR-130b-5p  | 15617308 | 17985385 | 25    | 12    | 1.6008 | 0.6672  | -1.26260188 | 0.0104737 | *  |
| RNA-con-RNA-P3 | hsa-miR-584-5p   | 15617308 | 17985385 | 1158  | 560   | 74.149 | 31.1364 | -1.25181536 | 2.18E-68  | ** |
| RNA-con-RNA-P3 | hsa-miR-499a-5p  | 15617308 | 17985385 | 62    | 30    | 3.97   | 1.668   | -1.25101972 | 5.67E-05  | ** |
| RNA-con-RNA-P3 | hsa-miR-589-5p   | 15617308 | 17985385 | 341   | 168   | 21.835 | 9.3409  | -1.22498924 | 1.19E-20  | ** |
| RNA-con-RNA-P3 | hsa-miR-16-1-3p  | 15617308 | 17985385 | 28    | 14    | 1.7929 | 0.7784  | -1.20371141 | 0.0089932 | ** |
| RNA-con-RNA-P3 | hsa-miR-6511a-5p | 15617308 | 17985385 | 28    | 14    | 1.7929 | 0.7784  | -1.20371141 | 0.0089932 | ** |
| RNA-con-RNA-P3 | hsa-miR-6511b-5p | 15617308 | 17985385 | 28    | 14    | 1.7929 | 0.7784  | -1.20371141 | 0.0089932 | ** |
| RNA-con-RNA-P3 | hsa-miR-186-3p   | 15617308 | 17985385 | 20    | 10    | 1.2806 | 0.556   | -1.20366313 | 0.0277805 | *  |
| RNA-con-RNA-P3 | hsa-miR-374b-3p  | 15617308 | 17985385 | 91    | 46    | 5.8269 | 2.5576  | -1.1879379  | 2.76E-06  | ** |
| RNA-con-RNA-P3 | hsa-miR-127-3p   | 15617308 | 17985385 | 5582  | 2835  | 357.42 | 157.628 | -1.18111268 | 5.75E-294 | ** |
| RNA-con-RNA-P3 | hsa-miR-27b-5p   | 15617308 | 17985385 | 900   | 460   | 57.628 | 25.5763 | -1.17197239 | 2.12E-48  | ** |
| RNA-con-RNA-P3 | hsa-miR-3192     | 15617308 | 17985385 | 131   | 68    | 8.3881 | 3.7808  | -1.14965253 | 4.17E-08  | ** |
| RNA-con-RNA-P3 | hsa-miR-433      | 15617308 | 17985385 | 636   | 333   | 40.724 | 18.515  | -1.13718472 | 3.83E-33  | ** |
| RNA-con-RNA-P3 | hsa-miR-1193     | 15617308 | 17985385 | 63    | 33    | 4.034  | 1.8348  | -1.13658827 | 0.0001694 | ** |
| RNA-con-RNA-P3 | hsa-miR-3679-5p  | 15617308 | 17985385 | 19    | 10    | 1.2166 | 0.556   | -1.12969812 | 0.0415034 | *  |
| RNA-con-RNA-P3 | hsa-let-7a-5p    | 15617308 | 17985385 | 4E+06 | 2E+06 | 246579 | 113452  | -1.11996347 | 0         | ** |
| RNA-con-RNA-P3 | hsa-miR-323a-5p  | 15617308 | 17985385 | 194   | 104   | 12.422 | 5.7825  | -1.10314382 | 1.06E-10  | ** |
| RNA-con-RNA-P3 | hsa-miR-330-3p   | 15617308 | 17985385 | 26    | 14    | 1.6648 | 0.7784  | -1.09676525 | 0.0194944 | *  |
| RNA-con-RNA-P3 | hsa-miR-505-5p   | 15617308 | 17985385 | 178   | 96    | 11.398 | 5.3377  | -1.09443994 | 7.97E-10  | ** |
| RNA-con-RNA-P3 | hsa-miR-432-5p   | 15617308 | 17985385 | 14808 | 8078  | 948.18 | 449.143 | -1.07798589 | 0         | ** |
| RNA-con-RNA-P3 | hsa-miR-101-3p   | 15617308 | 17985385 | 10560 | 5809  | 676.17 | 322.985 | -1.06592726 | 0         | ** |
| RNA-con-RNA-P3 | hsa-miR-98-5p    | 15617308 | 17985385 | 1968  | 1085  | 126.01 | 60.3268 | -1.06271306 | 9.83E-89  | ** |
| RNA-con-RNA-P3 | hsa-miR-379-5p   | 15617308 | 17985385 | 1297  | 719   | 83.049 | 39.9769 | -1.05479446 | 2.08E-58  | ** |
| RNA-con-RNA-P3 | hsa-miR-132-5p   | 15617308 | 17985385 | 18    | 10    | 1.1526 | 0.556   | -1.05173514 | 0.0611879 |    |
| RNA-con-RNA-P3 | hsa-miR-377-5p   | 15617308 | 17985385 | 132   | 74    | 8.4522 | 4.1145  | -1.03860978 | 4.02E-07  | ** |
| RNA-con-RNA-P3 | hsa-miR-105-5p   | 15617308 | 17985385 | 41    | 23    | 2.6253 | 1.2788  | -1.03769164 | 0.0049139 | ** |
| RNA-con-RNA-P3 | hsa-miR-323a-3p  | 15617308 | 17985385 | 2661  | 1493  | 170.39 | 83.0118 | -1.03743455 | 9.53E-115 | ** |
| RNA-con-RNA-P3 | hsa-miR-25-3p    | 15617308 | 17985385 | 40202 | 22908 | 2574.2 | 1273.7  | -1.01509504 | 0         | ** |
| RNA-con-RNA-P3 | hsa-miR-1277-3p  | 15617308 | 17985385 | 28    | 16    | 1.7929 | 0.8896  | -1.01106633 | 0.0231996 | *  |
| RNA-con-RNA-P3 | hsa-miR-664a-5p  | 15617308 | 17985385 | 279   | 160   | 17.865 | 8.8961  | -1.00587485 | 6.89E-13  | ** |
| RNA-con-RNA-P3 | hsa-miR-660-3p   | 15617308 | 17985385 | 33    | 19    | 2.113  | 1.0564  | -1.00013656 | 0.0144751 | *  |
| RNA-con-RNA-P3 | hsa-miR-183-3p   | 15617308 | 17985385 | 74    | 43    | 4.7383 | 2.3908  | -0.9868761  | 0.0002798 |    |
| RNA-con-RNA-P3 | hsa-miR-1254     | 15617308 | 17985385 | 24    | 14    | 1.5368 | 0.7784  | -0.98134581 | 0.0405234 |    |
| RNA-con-RNA-P3 | hsa-miR-20b-3p   | 15617308 | 17985385 | 108   | 63    | 6.9154 | 3.5028  | -0.98130409 | 1.23E-05  |    |
| RNA-con-RNA-P3 | hsa-miR-590-3p   | 15617308 | 17985385 | 41    | 24    | 2.6253 | 1.3344  | -0.9762911  | 0.0074788 |    |
| RNA-con-RNA-P3 | hsa-miR-196b-5p  | 15617308 | 17985385 | 68    | 40    | 4.3541 | 2.224   | -0.96921775 | 0.000603  |    |
| RNA-con-RNA-P3 | hsa-miR-218-5p   | 15617308 | 17985385 | 22    | 13    | 1.4087 | 0.7228  | -0.96269599 | 0.053726  |    |

|                |                 |          |          |       |       |        |         |             |                       |  |
|----------------|-----------------|----------|----------|-------|-------|--------|---------|-------------|-----------------------|--|
| RNA-con-RNA-P3 | hsa-miR-449a    | 15617308 | 17985385 | 22    | 13    | 1.4087 | 0.7228  | -0.96269599 | 0.053726              |  |
| RNA-con-RNA-P3 | hsa-miR-3129-5p | 15617308 | 17985385 | 98    | 58    | 6.2751 | 3.2248  | -0.96042876 | 4.31E-05              |  |
| RNA-con-RNA-P3 | hsa-miR-30d-5p  | 15617308 | 17985385 | 8327  | 4940  | 533.19 | 274.668 | -0.95696486 | 2.01081025553286e-310 |  |
| RNA-con-RNA-P3 | hsa-miR-486-3p  | 15617308 | 17985385 | 64    | 38    | 4.098  | 2.1128  | -0.95576378 | 0.0010065             |  |
| RNA-con-RNA-P3 | hsa-miR-374a-5p | 15617308 | 17985385 | 585   | 348   | 37.458 | 19.349  | -0.95303027 | 2.65E-23              |  |
| RNA-con-RNA-P3 | hsa-miR-532-5p  | 15617308 | 17985385 | 609   | 370   | 38.995 | 20.5723 | -0.92259345 | 5.39E-23              |  |
| RNA-con-RNA-P3 | hsa-miR-889     | 15617308 | 17985385 | 2638  | 1608  | 168.92 | 89.4059 | -0.91785721 | 4.31E-93              |  |
| RNA-con-RNA-P3 | hsa-miR-873-3p  | 15617308 | 17985385 | 36    | 22    | 2.3051 | 1.2232  | -0.91416903 | 0.0177315             |  |
| RNA-con-RNA-P3 | hsa-miR-493-3p  | 15617308 | 17985385 | 289   | 177   | 18.505 | 9.8413  | -0.91100212 | 1.73E-11              |  |
| RNA-con-RNA-P3 | hsa-miR-3064-5p | 15617308 | 17985385 | 16    | 10    | 1.0245 | 0.556   | -0.8817632  | 0.1273189             |  |
| RNA-con-RNA-P3 | hsa-miR-502-3p  | 15617308 | 17985385 | 134   | 84    | 8.5802 | 4.6705  | -0.87743427 | 9.23E-06              |  |
| RNA-con-RNA-P3 | hsa-miR-339-3p  | 15617308 | 17985385 | 497   | 312   | 31.824 | 17.3474 | -0.87538213 | 1.45E-17              |  |
| RNA-con-RNA-P3 | hsa-miR-590-5p  | 15617308 | 17985385 | 43    | 27    | 2.7534 | 1.5012  | -0.87509802 | 0.0124321             |  |
| RNA-con-RNA-P3 | hsa-miR-1185-5p | 15617308 | 17985385 | 108   | 68    | 6.9154 | 3.7808  | -0.87112117 | 7.64E-05              |  |
| RNA-con-RNA-P3 | hsa-miR-654-5p  | 15617308 | 17985385 | 120   | 76    | 7.6838 | 4.2257  | -0.86262962 | 3.54E-05              |  |
| RNA-con-RNA-P3 | hsa-miR-26b-5p  | 15617308 | 17985385 | 4084  | 2593  | 261.5  | 144.173 | -0.85903987 | 4.90E-128             |  |
| RNA-con-RNA-P3 | hsa-miR-99b-5p  | 15617308 | 17985385 | 9004  | 5718  | 576.54 | 317.925 | -0.85873464 | 1.23E-279             |  |
| RNA-con-RNA-P3 | hsa-miR-130b-3p | 15617308 | 17985385 | 1010  | 643   | 64.672 | 35.7513 | -0.85514106 | 8.97E-33              |  |
| RNA-con-RNA-P3 | hsa-miR-3152-3p | 15617308 | 17985385 | 50    | 32    | 3.2016 | 1.7792  | -0.84756438 | 0.0086738             |  |
| RNA-con-RNA-P3 | hsa-let-7a-3p   | 15617308 | 17985385 | 64    | 41    | 4.098  | 2.2796  | -0.84613929 | 0.0030042             |  |
| RNA-con-RNA-P3 | hsa-miR-4485    | 15617308 | 17985385 | 106   | 68    | 6.7873 | 3.7808  | -0.84414625 | 0.0001363             |  |
| RNA-con-RNA-P3 | hsa-miR-151a-5p | 15617308 | 17985385 | 786   | 508   | 50.329 | 28.2452 | -0.83337848 | 7.99E-25              |  |
| RNA-con-RNA-P3 | hsa-miR-323b-3p | 15617308 | 17985385 | 136   | 88    | 8.7083 | 4.8929  | -0.83170131 | 1.97E-05              |  |
| RNA-con-RNA-P3 | hsa-miR-17-3p   | 15617308 | 17985385 | 747   | 484   | 47.832 | 26.9107 | -0.82978112 | 1.65E-23              |  |
| RNA-con-RNA-P3 | hsa-let-7f-5p   | 15617308 | 17985385 | 2E+06 | 1E+06 | 122472 | 69002.9 | -0.82772277 | 0                     |  |
| RNA-con-RNA-P3 | hsa-miR-450b-5p | 15617308 | 17985385 | 20    | 13    | 1.2806 | 0.7228  | -0.8251515  | 0.1062651             |  |
| RNA-con-RNA-P3 | hsa-miR-127-5p  | 15617308 | 17985385 | 156   | 102   | 9.9889 | 5.6713  | -0.81664634 | 6.78E-06              |  |
| RNA-con-RNA-P3 | hsa-miR-539-3p  | 15617308 | 17985385 | 217   | 142   | 13.895 | 7.8953  | -0.81547908 | 1.14E-07              |  |
| RNA-con-RNA-P3 | hsa-miR-2355-5p | 15617308 | 17985385 | 41    | 27    | 2.6253 | 1.5012  | -0.8063661  | 0.0228402             |  |
| RNA-con-RNA-P3 | hsa-miR-320b    | 15617308 | 17985385 | 1495  | 987   | 95.727 | 54.8779 | -0.80270213 | 5.95E-43              |  |
| RNA-con-RNA-P3 | hsa-miR-130a-3p | 15617308 | 17985385 | 2365  | 1564  | 151.43 | 86.9595 | -0.80027837 | 1.44E-66              |  |
| RNA-con-RNA-P3 | hsa-miR-409-3p  | 15617308 | 17985385 | 1167  | 773   | 74.725 | 42.9793 | -0.79794514 | 1.42E-33              |  |
| RNA-con-RNA-P3 | hsa-miR-548x-3p | 15617308 | 17985385 | 209   | 139   | 13.383 | 7.7285  | -0.79209809 | 3.87E-07              |  |
| RNA-con-RNA-P3 | hsa-miR-548n    | 15617308 | 17985385 | 33    | 22    | 2.113  | 1.2232  | -0.78863246 | 0.0453106             |  |
| RNA-con-RNA-P3 | hsa-miR-31-5p   | 15617308 | 17985385 | 10185 | 6839  | 652.16 | 380.253 | -0.778268   | 4.40E-267             |  |
| RNA-con-RNA-P3 | hsa-miR-455-5p  | 15617308 | 17985385 | 101   | 68    | 6.4672 | 3.7808  | -0.77444969 | 0.0005457             |  |
| RNA-con-RNA-P3 | hsa-miR-30e-3p  | 15617308 | 17985385 | 126   | 85    | 8.068  | 4.7261  | -0.77156093 | 0.000118              |  |
| RNA-con-RNA-P3 | hsa-miR-676-3p  | 15617308 | 17985385 | 37    | 25    | 2.3692 | 1.39    | -0.76931511 | 0.0379276             |  |
| RNA-con-RNA-P3 | hsa-miR-382-3p  | 15617308 | 17985385 | 1994  | 1348  | 127.68 | 74.9497 | -0.76852552 | 1.04E-52              |  |
| RNA-con-RNA-P3 | hsa-miR-411-5p  | 15617308 | 17985385 | 670   | 453   | 42.901 | 25.1871 | -0.76832962 | 8.45E-19              |  |
| RNA-con-RNA-P3 | hsa-miR-450a-5p | 15617308 | 17985385 | 34    | 23    | 2.1771 | 1.2788  | -0.76761703 | 0.0471124             |  |

|                |                   |          |          |       |       |        |         |             |           |  |
|----------------|-------------------|----------|----------|-------|-------|--------|---------|-------------|-----------|--|
| RNA-con-RNA-P3 | hsa-miR-192-5p    | 15617308 | 17985385 | 4500  | 3059  | 288.14 | 170.083 | -0.76054426 | 1.53E-114 |  |
| RNA-con-RNA-P3 | hsa-miR-494       | 15617308 | 17985385 | 1274  | 869   | 81.576 | 48.317  | -0.75561742 | 2.35E-33  |  |
| RNA-con-RNA-P3 | hsa-miR-548k      | 15617308 | 17985385 | 41    | 28    | 2.6253 | 1.5568  | -0.75389868 | 0.031728  |  |
| RNA-con-RNA-P3 | hsa-miR-485-5p    | 15617308 | 17985385 | 2697  | 1861  | 172.69 | 103.473 | -0.73895664 | 4.26E-66  |  |
| RNA-con-RNA-P3 | hsa-miR-21-3p     | 15617308 | 17985385 | 1284  | 888   | 82.217 | 49.3734 | -0.73569396 | 3.79E-32  |  |
| RNA-con-RNA-P3 | hsa-let-7g-5p     | 15617308 | 17985385 | 1E+05 | 70201 | 6491.9 | 3903.22 | -0.7339742  | 0         |  |
| RNA-con-RNA-P3 | hsa-miR-9-3p      | 15617308 | 17985385 | 1855  | 1286  | 118.78 | 71.5025 | -0.73220813 | 2.57E-45  |  |
| RNA-con-RNA-P3 | hsa-miR-1291      | 15617308 | 17985385 | 156   | 109   | 9.9889 | 6.0605  | -0.72088899 | 5.38E-05  |  |
| RNA-con-RNA-P3 | hsa-miR-26a-5p    | 15617308 | 17985385 | 3924  | 2742  | 251.26 | 152.457 | -0.72077595 | 2.53E-91  |  |
| RNA-con-RNA-P3 | hsa-miR-543       | 15617308 | 17985385 | 2173  | 1531  | 139.14 | 85.1247 | -0.7088927  | 5.77E-50  |  |
| RNA-con-RNA-P3 | hsa-miR-183-5p    | 15617308 | 17985385 | 201   | 142   | 12.87  | 7.8953  | -0.70497969 | 6.93E-06  |  |
| RNA-con-RNA-P3 | hsa-miR-125b-5p   | 15617308 | 17985385 | 7010  | 4965  | 448.86 | 276.058 | -0.70129995 | 4.34E-154 |  |
| RNA-con-RNA-P3 | hsa-miR-1185-2-3p | 15617308 | 17985385 | 48    | 34    | 3.0735 | 1.8904  | -0.70119095 | 0.029059  |  |
| RNA-con-RNA-P3 | hsa-miR-452-5p    | 15617308 | 17985385 | 1018  | 725   | 65.184 | 40.3105 | -0.69336442 | 1.95E-23  |  |
| RNA-con-RNA-P3 | hsa-miR-136-5p    | 15617308 | 17985385 | 392   | 281   | 25.1   | 15.6238 | -0.68396497 | 9.66E-10  |  |
| RNA-con-RNA-P3 | hsa-miR-107       | 15617308 | 17985385 | 1E+05 | 87320 | 7774.2 | 4855.05 | -0.67920624 | 0         |  |
| RNA-con-RNA-P3 | hsa-miR-16-2-3p   | 15617308 | 17985385 | 107   | 77    | 6.8514 | 4.2813  | -0.67834988 | 0.0015278 |  |
| RNA-con-RNA-P3 | hsa-miR-196a-5p   | 15617308 | 17985385 | 3835  | 2762  | 245.56 | 153.569 | -0.67719291 | 3.42E-80  |  |
| RNA-con-RNA-P3 | hsa-miR-10b-3p    | 15617308 | 17985385 | 18    | 13    | 1.1526 | 0.7228  | -0.67322351 | 0.1987515 |  |
| RNA-con-RNA-P3 | hsa-miR-1273c     | 15617308 | 17985385 | 18    | 13    | 1.1526 | 0.7228  | -0.67322351 | 0.1987515 |  |
| RNA-con-RNA-P3 | hsa-miR-497-5p    | 15617308 | 17985385 | 33    | 24    | 2.113  | 1.3344  | -0.66310157 | 0.0851592 |  |
| RNA-con-RNA-P3 | hsa-miR-382-5p    | 15617308 | 17985385 | 3743  | 2734  | 239.67 | 152.012 | -0.65686127 | 2.73E-74  |  |
| RNA-con-RNA-P3 | hsa-miR-500a-3p   | 15617308 | 17985385 | 82    | 60    | 5.2506 | 3.336   | -0.654363   | 0.0072172 |  |
| RNA-con-RNA-P3 | hsa-miR-378a-3p   | 15617308 | 17985385 | 2425  | 1782  | 155.28 | 99.0804 | -0.64816698 | 1.14E-47  |  |
| RNA-con-RNA-P3 | hsa-miR-191-5p    | 15617308 | 17985385 | 21717 | 16008 | 1390.6 | 890.056 | -0.64371105 | 0         |  |
| RNA-con-RNA-P3 | hsa-miR-1278      | 15617308 | 17985385 | 123   | 91    | 7.8759 | 5.0597  | -0.63839295 | 0.0012801 |  |
| RNA-con-RNA-P3 | hsa-miR-629-5p    | 15617308 | 17985385 | 104   | 77    | 6.6593 | 4.2813  | -0.6373216  | 0.0031121 |  |
| RNA-con-RNA-P3 | hsa-miR-21-5p     | 15617308 | 17985385 | 3E+05 | 2E+05 | 16763  | 10794.8 | -0.634982   | 0         |  |
| RNA-con-RNA-P3 | hsa-miR-182-5p    | 15617308 | 17985385 | 989   | 736   | 63.327 | 40.9221 | -0.62994511 | 1.72E-19  |  |
| RNA-con-RNA-P3 | hsa-miR-496       | 15617308 | 17985385 | 55    | 41    | 3.5217 | 2.2796  | -0.62749132 | 0.0341039 |  |
| RNA-con-RNA-P3 | hsa-miR-18a-5p    | 15617308 | 17985385 | 63    | 47    | 4.034  | 2.6132  | -0.62639354 | 0.0235397 |  |
| RNA-con-RNA-P3 | hsa-miR-3605-5p   | 15617308 | 17985385 | 40    | 30    | 2.5613 | 1.668   | -0.61875695 | 0.0745067 |  |
| RNA-con-RNA-P3 | hsa-miR-2355-3p   | 15617308 | 17985385 | 16    | 12    | 1.0245 | 0.6672  | -0.61872879 | 0.2607179 |  |
| RNA-con-RNA-P3 | hsa-miR-1255b-5p  | 15617308 | 17985385 | 20    | 15    | 1.2806 | 0.834   | -0.61870063 | 0.2081575 |  |
| RNA-con-RNA-P3 | hsa-miR-25-5p     | 15617308 | 17985385 | 11364 | 8548  | 727.65 | 475.275 | -0.6144911  | 6.35E-197 |  |
| RNA-con-RNA-P3 | hsa-miR-1262      | 15617308 | 17985385 | 122   | 92    | 7.8118 | 5.1153  | -0.61083616 | 0.0020457 |  |
| RNA-con-RNA-P3 | hsa-miR-574-5p    | 15617308 | 17985385 | 74    | 56    | 4.7383 | 3.1136  | -0.60578593 | 0.0171877 |  |
| RNA-con-RNA-P3 | hsa-miR-1271-5p   | 15617308 | 17985385 | 38    | 29    | 2.4332 | 1.6124  | -0.59364522 | 0.093886  |  |
| RNA-con-RNA-P3 | hsa-miR-374a-3p   | 15617308 | 17985385 | 581   | 444   | 37.202 | 24.6867 | -0.59165782 | 6.06E-11  |  |
| RNA-con-RNA-P3 | hsa-miR-484       | 15617308 | 17985385 | 47    | 36    | 3.0095 | 2.0016  | -0.58837012 | 0.0644712 |  |
| RNA-con-RNA-P3 | hsa-miR-125b-1-3p | 15617308 | 17985385 | 60    | 46    | 3.8419 | 2.5576  | -0.58702932 | 0.037032  |  |

|                |                   |          |          |       |       |        |         |             |           |  |
|----------------|-------------------|----------|----------|-------|-------|--------|---------|-------------|-----------|--|
| RNA-con-RNA-P3 | hsa-miR-151a-3p   | 15617308 | 17985385 | 1055  | 810   | 67.553 | 45.0366 | -0.58492833 | 2.64E-18  |  |
| RNA-con-RNA-P3 | hsa-miR-181a-2-3p | 15617308 | 17985385 | 1531  | 1176  | 98.032 | 65.3864 | -0.58426658 | 8.52E-26  |  |
| RNA-con-RNA-P3 | hsa-miR-424-3p    | 15617308 | 17985385 | 1058  | 814   | 67.745 | 45.259  | -0.58191828 | 3.38E-18  |  |
| RNA-con-RNA-P3 | hsa-miR-106b-5p   | 15617308 | 17985385 | 1275  | 982   | 81.64  | 54.5999 | -0.58038141 | 1.64E-21  |  |
| RNA-con-RNA-P3 | hsa-miR-320c      | 15617308 | 17985385 | 386   | 298   | 24.716 | 16.569  | -0.57697042 | 1.86E-07  |  |
| RNA-con-RNA-P3 | hsa-miR-30c-1-3p  | 15617308 | 17985385 | 31    | 24    | 1.985  | 1.3344  | -0.57294781 | 0.1428399 |  |
| RNA-con-RNA-P3 | hsa-miR-365a-5p   | 15617308 | 17985385 | 67    | 52    | 4.2901 | 2.8912  | -0.56934287 | 0.0320122 |  |
| RNA-con-RNA-P3 | hsa-miR-140-3p    | 15617308 | 17985385 | 1E+05 | 78363 | 6438   | 4357.04 | -0.56327605 | 0         |  |
| RNA-con-RNA-P3 | hsa-miR-548h-5p   | 15617308 | 17985385 | 689   | 543   | 44.118 | 30.1912 | -0.54722948 | 3.15E-11  |  |
| RNA-con-RNA-P3 | hsa-miR-194-5p    | 15617308 | 17985385 | 38    | 30    | 2.4332 | 1.668   | -0.54473562 | 0.1209087 |  |
| RNA-con-RNA-P3 | hsa-miR-93-5p     | 15617308 | 17985385 | 1648  | 1303  | 105.52 | 72.4477 | -0.542558   | 2.22E-24  |  |
| RNA-con-RNA-P3 | hsa-miR-425-3p    | 15617308 | 17985385 | 73    | 58    | 4.6743 | 3.2248  | -0.53554064 | 0.0341715 |  |
| RNA-con-RNA-P3 | hsa-miR-24-3p     | 15617308 | 17985385 | 13091 | 10436 | 838.24 | 580.249 | -0.5306858  | 2.66E-174 |  |
| RNA-con-RNA-P3 | hsa-miR-485-3p    | 15617308 | 17985385 | 576   | 460   | 36.882 | 25.5763 | -0.52811714 | 4.16E-09  |  |
| RNA-con-RNA-P3 | hsa-miR-106b-3p   | 15617308 | 17985385 | 684   | 547   | 43.798 | 30.4136 | -0.52613522 | 1.73E-10  |  |
| RNA-con-RNA-P3 | hsa-miR-125a-5p   | 15617308 | 17985385 | 1457  | 1174  | 93.294 | 65.2752 | -0.51524778 | 6.22E-20  |  |
| RNA-con-RNA-P3 | hsa-miR-708-5p    | 15617308 | 17985385 | 816   | 658   | 52.25  | 36.5853 | -0.51415866 | 8.66E-12  |  |
| RNA-con-RNA-P3 | hsa-miR-30e-5p    | 15617308 | 17985385 | 455   | 368   | 29.134 | 20.4611 | -0.50983494 | 4.22E-07  |  |
| RNA-con-RNA-P3 | hsa-miR-423-3p    | 15617308 | 17985385 | 1248  | 1016  | 79.911 | 56.4903 | -0.50039636 | 1.77E-16  |  |
| RNA-con-RNA-P3 | hsa-miR-125a-3p   | 15617308 | 17985385 | 140   | 114   | 8.9644 | 6.3385  | -0.50006556 | 0.0058401 |  |
| RNA-con-RNA-P3 | hsa-miR-103a-3p   | 15617308 | 17985385 | 2E+05 | 1E+05 | 10867  | 7743.62 | -0.48881159 | 0         |  |
| RNA-con-RNA-P3 | hsa-miR-493-5p    | 15617308 | 17985385 | 735   | 605   | 47.063 | 33.6384 | -0.48449033 | 8.44E-10  |  |
| RNA-con-RNA-P3 | hsa-miR-708-3p    | 15617308 | 17985385 | 176   | 145   | 11.27  | 8.0621  | -0.48319592 | 0.0027414 |  |
| RNA-con-RNA-P3 | hsa-miR-1185-1-3p | 15617308 | 17985385 | 46    | 38    | 2.9455 | 2.1128  | -0.47935635 | 0.1285536 |  |
| RNA-con-RNA-P3 | hsa-miR-17-5p     | 15617308 | 17985385 | 614   | 510   | 39.315 | 28.3564 | -0.47142015 | 4.51E-08  |  |
| RNA-con-RNA-P3 | hsa-miR-361-5p    | 15617308 | 17985385 | 83    | 69    | 5.3146 | 3.8364  | -0.47020796 | 0.0448482 |  |
| RNA-con-RNA-P3 | hsa-miR-28-5p     | 15617308 | 17985385 | 149   | 124   | 9.5407 | 6.8945  | -0.46864919 | 0.0073675 |  |
| RNA-con-RNA-P3 | hsa-miR-767-5p    | 15617308 | 17985385 | 238   | 200   | 15.24  | 11.1201 | -0.45464581 | 0.0009895 |  |
| RNA-con-RNA-P3 | hsa-miR-345-5p    | 15617308 | 17985385 | 44    | 37    | 2.8174 | 2.0572  | -0.45368235 | 0.1575005 |  |
| RNA-con-RNA-P3 | hsa-miR-652-3p    | 15617308 | 17985385 | 20    | 17    | 1.2806 | 0.9452  | -0.43812838 | 0.3556835 |  |
| RNA-con-RNA-P3 | hsa-miR-9-5p      | 15617308 | 17985385 | 3967  | 3387  | 254.01 | 188.32  | -0.43171917 | 1.31E-37  |  |
| RNA-con-RNA-P3 | hsa-let-7i-5p     | 15617308 | 17985385 | 71777 | 61975 | 4596   | 3445.85 | -0.41551452 | 0         |  |
| RNA-con-RNA-P3 | hsa-miR-369-3p    | 15617308 | 17985385 | 276   | 240   | 17.673 | 13.3442 | -0.40530965 | 0.0014285 |  |
| RNA-con-RNA-P3 | hsa-miR-139-3p    | 15617308 | 17985385 | 56    | 49    | 3.5858 | 2.7244  | -0.39635649 | 0.1591889 |  |
| RNA-con-RNA-P3 | hsa-miR-410       | 15617308 | 17985385 | 88    | 77    | 5.6348 | 4.2813  | -0.39631547 | 0.0777072 |  |
| RNA-con-RNA-P3 | hsa-miR-30a-3p    | 15617308 | 17985385 | 2428  | 2130  | 155.47 | 118.43  | -0.39259381 | 4.33E-20  |  |
| RNA-con-RNA-P3 | hsa-miR-186-5p    | 15617308 | 17985385 | 346   | 304   | 22.155 | 16.9026 | -0.39038063 | 0.0005657 |  |
| RNA-con-RNA-P3 | hsa-miR-3613-3p   | 15617308 | 17985385 | 17    | 15    | 1.0885 | 0.834   | -0.38422212 | 0.4497767 |  |
| RNA-con-RNA-P3 | hsa-miR-28-3p     | 15617308 | 17985385 | 647   | 573   | 41.428 | 31.8592 | -0.37891006 | 4.55E-06  |  |
| RNA-con-RNA-P3 | hsa-miR-1304-5p   | 15617308 | 17985385 | 18    | 16    | 1.1526 | 0.8896  | -0.37366323 | 0.4485843 |  |
| RNA-con-RNA-P3 | hsa-miR-181a-3p   | 15617308 | 17985385 | 669   | 597   | 42.837 | 33.1936 | -0.36795571 | 5.75E-06  |  |

|                |                   |          |          |       |       |        |         |             |           |  |
|----------------|-------------------|----------|----------|-------|-------|--------|---------|-------------|-----------|--|
| RNA-con-RNA-P3 | hsa-miR-100-5p    | 15617308 | 17985385 | 7653  | 6855  | 490.03 | 381.143 | -0.36254787 | 1.08E-51  |  |
| RNA-con-RNA-P3 | hsa-miR-941       | 15617308 | 17985385 | 170   | 153   | 10.885 | 8.5069  | -0.35568902 | 0.0267197 |  |
| RNA-con-RNA-P3 | hsa-miR-329       | 15617308 | 17985385 | 349   | 315   | 22.347 | 17.5142 | -0.35155608 | 0.0016952 |  |
| RNA-con-RNA-P3 | hsa-miR-576-3p    | 15617308 | 17985385 | 21    | 19    | 1.3447 | 1.0564  | -0.34812814 | 0.4434596 |  |
| RNA-con-RNA-P3 | hsa-miR-125b-2-3p | 15617308 | 17985385 | 128   | 116   | 8.196  | 6.4497  | -0.34568793 | 0.0611768 |  |
| RNA-con-RNA-P3 | hsa-miR-363-3p    | 15617308 | 17985385 | 97    | 88    | 6.2111 | 4.8929  | -0.344159   | 0.1044951 |  |
| RNA-con-RNA-P3 | hsa-miR-320d      | 15617308 | 17985385 | 44    | 40    | 2.8174 | 2.224   | -0.34120762 | 0.2774696 |  |
| RNA-con-RNA-P3 | hsa-miR-542-3p    | 15617308 | 17985385 | 23    | 21    | 1.4727 | 1.1676  | -0.33491746 | 0.4391439 |  |
| RNA-con-RNA-P3 | hsa-miR-148a-3p   | 15617308 | 17985385 | 461   | 421   | 29.519 | 23.4079 | -0.3346239  | 0.0005737 |  |
| RNA-con-RNA-P3 | hsa-miR-143-3p    | 15617308 | 17985385 | 1063  | 972   | 68.066 | 54.0439 | -0.33279194 | 1.98E-07  |  |
| RNA-con-RNA-P3 | hsa-miR-134       | 15617308 | 17985385 | 665   | 611   | 42.581 | 33.972  | -0.32586368 | 5.50E-05  |  |
| RNA-con-RNA-P3 | hsa-miR-486-5p    | 15617308 | 17985385 | 175   | 161   | 11.206 | 8.9517  | -0.32397343 | 0.039498  |  |
| RNA-con-RNA-P3 | hsa-miR-324-5p    | 15617308 | 17985385 | 107   | 99    | 6.8514 | 5.5045  | -0.31578729 | 0.115857  |  |
| RNA-con-RNA-P3 | hsa-miR-224-5p    | 15617308 | 17985385 | 175   | 162   | 11.206 | 9.0073  | -0.31504041 | 0.0449254 |  |
| RNA-con-RNA-P3 | hsa-miR-221-3p    | 15617308 | 17985385 | 85059 | 79673 | 5446.5 | 4429.87 | -0.29805223 | 0         |  |
| RNA-con-RNA-P3 | hsa-miR-378c      | 15617308 | 17985385 | 175   | 165   | 11.206 | 9.1741  | -0.28856849 | 0.0649637 |  |
| RNA-con-RNA-P3 | hsa-miR-369-5p    | 15617308 | 17985385 | 238   | 225   | 15.24  | 12.5102 | -0.28471072 | 0.0336424 |  |
| RNA-con-RNA-P3 | hsa-miR-376b-3p   | 15617308 | 17985385 | 137   | 130   | 8.7723 | 7.2281  | -0.27933869 | 0.1132392 |  |
| RNA-con-RNA-P3 | hsa-miR-20a-5p    | 15617308 | 17985385 | 214   | 204   | 13.703 | 11.3425 | -0.27272153 | 0.0531386 |  |
| RNA-con-RNA-P3 | hsa-miR-335-5p    | 15617308 | 17985385 | 573   | 548   | 36.69  | 30.4692 | -0.26803922 | 0.0018672 |  |
| RNA-con-RNA-P3 | hsa-miR-656       | 15617308 | 17985385 | 29    | 28    | 1.8569 | 1.5568  | -0.25431251 | 0.5023144 |  |
| RNA-con-RNA-P3 | hsa-miR-30a-5p    | 15617308 | 17985385 | 13642 | 13175 | 873.52 | 732.539 | -0.25393147 | 4.62E-47  |  |
| RNA-con-RNA-P3 | hsa-miR-3615      | 15617308 | 17985385 | 112   | 109   | 7.1715 | 6.0605  | -0.24283808 | 0.2098947 |  |
| RNA-con-RNA-P3 | hsa-miR-5481      | 15617308 | 17985385 | 18    | 18    | 1.1526 | 1.0008  | -0.20373823 | 0.6656587 |  |
| RNA-con-RNA-P3 | hsa-miR-337-5p    | 15617308 | 17985385 | 22    | 22    | 1.4087 | 1.2232  | -0.20370409 | 0.634094  |  |
| RNA-con-RNA-P3 | hsa-miR-1301      | 15617308 | 17985385 | 132   | 134   | 8.4522 | 7.4505  | -0.18198966 | 0.3022439 |  |
| RNA-con-RNA-P3 | hsa-miR-655       | 15617308 | 17985385 | 131   | 133   | 8.3881 | 7.3949  | -0.18181342 | 0.304491  |  |
| RNA-con-RNA-P3 | hsa-miR-15b-3p    | 15617308 | 17985385 | 100   | 102   | 6.4032 | 5.6713  | -0.1751136  | 0.3863855 |  |
| RNA-con-RNA-P3 | hsa-miR-30c-2-3p  | 15617308 | 17985385 | 1595  | 1648  | 102.13 | 91.63   | -0.15651902 | 0.002014  |  |
| RNA-con-RNA-P3 | hsa-miR-625-3p    | 15617308 | 17985385 | 58    | 60    | 3.7138 | 3.336   | -0.15477683 | 0.5565079 |  |
| RNA-con-RNA-P3 | hsa-miR-24-2-5p   | 15617308 | 17985385 | 110   | 115   | 7.0435 | 6.3941  | -0.13955119 | 0.4658388 |  |
| RNA-con-RNA-P3 | hsa-miR-148b-3p   | 15617308 | 17985385 | 226   | 237   | 14.471 | 13.1774 | -0.13510885 | 0.3125606 |  |
| RNA-con-RNA-P3 | hsa-miR-30b-3p    | 15617308 | 17985385 | 187   | 202   | 11.974 | 11.2313 | -0.0923682  | 0.5258318 |  |
| RNA-con-RNA-P3 | hsa-miR-15a-5p    | 15617308 | 17985385 | 1010  | 1113  | 64.672 | 61.8836 | -0.06357964 | 0.3098802 |  |
| RNA-con-RNA-P3 | hsa-miR-193b-5p   | 15617308 | 17985385 | 175   | 194   | 11.206 | 10.7865 | -0.05498021 | 0.7115965 |  |
| RNA-con-RNA-P3 | hsa-miR-503-5p    | 15617308 | 17985385 | 585   | 653   | 37.458 | 36.3073 | -0.04502963 | 0.5819333 |  |
| RNA-con-RNA-P3 | hsa-miR-2110      | 15617308 | 17985385 | 137   | 155   | 8.7723 | 8.6181  | -0.02558531 | 0.8757049 |  |
| RNA-con-RNA-P3 | hsa-miR-598       | 15617308 | 17985385 | 1072  | 1226  | 68.642 | 68.1665 | -0.01002448 | 0.8665113 |  |
| RNA-con-RNA-P3 | hsa-miR-342-5p    | 15617308 | 17985385 | 19    | 22    | 1.2166 | 1.2232  | 0.0078054   | 0.9979859 |  |
| RNA-con-RNA-P3 | hsa-miR-30b-5p    | 15617308 | 17985385 | 55    | 64    | 3.5217 | 3.5584  | 0.01495668  | 0.9620919 |  |
| RNA-con-RNA-P3 | hsa-miR-1266      | 15617308 | 17985385 | 36    | 42    | 2.3051 | 2.3352  | 0.01871678  | 0.963241  |  |

|                |                  |          |          |       |       |        |         |            |           |  |
|----------------|------------------|----------|----------|-------|-------|--------|---------|------------|-----------|--|
| RNA-con-RNA-P3 | hsa-miR-376c-3p  | 15617308 | 17985385 | 702   | 820   | 44.95  | 45.5926 | 0.02047536 | 0.7844566 |  |
| RNA-con-RNA-P3 | hsa-miR-2682-5p  | 15617308 | 17985385 | 17    | 20    | 1.0885 | 1.112   | 0.03081538 | 0.9614002 |  |
| RNA-con-RNA-P3 | hsa-miR-92b-3p   | 15617308 | 17985385 | 1966  | 2320  | 125.89 | 128.994 | 0.03518164 | 0.4270539 |  |
| RNA-con-RNA-P3 | hsa-miR-29a-3p   | 15617308 | 17985385 | 2E+05 | 2E+05 | 10529  | 10890.1 | 0.04864963 | 6.34E-24  |  |
| RNA-con-RNA-P3 | hsa-miR-374b-5p  | 15617308 | 17985385 | 544   | 648   | 34.833 | 36.0293 | 0.04871175 | 0.5633631 |  |
| RNA-con-RNA-P3 | hsa-miR-138-5p   | 15617308 | 17985385 | 1866  | 2229  | 119.48 | 123.934 | 0.05276908 | 0.2441612 |  |
| RNA-con-RNA-P3 | hsa-miR-222-5p   | 15617308 | 17985385 | 59    | 71    | 3.7779 | 3.9476  | 0.0633913  | 0.8100531 |  |
| RNA-con-RNA-P3 | hsa-miR-138-1-3p | 15617308 | 17985385 | 18    | 22    | 1.1526 | 1.2232  | 0.08576839 | 0.8650759 |  |
| RNA-con-RNA-P3 | hsa-miR-210      | 15617308 | 17985385 | 603   | 740   | 38.611 | 41.1445 | 0.09168767 | 0.247468  |  |
| RNA-con-RNA-P3 | hsa-miR-29c-3p   | 15617308 | 17985385 | 878   | 1086  | 56.22  | 60.3824 | 0.10305235 | 0.1156935 |  |
| RNA-con-RNA-P3 | hsa-miR-574-3p   | 15617308 | 17985385 | 59    | 73    | 3.7779 | 4.0589  | 0.10350428 | 0.6889447 |  |
| RNA-con-RNA-P3 | hsa-miR-421      | 15617308 | 17985385 | 74    | 93    | 4.7383 | 5.1709  | 0.12604586 | 0.580696  |  |
| RNA-con-RNA-P3 | hsa-miR-339-5p   | 15617308 | 17985385 | 167   | 212   | 10.693 | 11.7873 | 0.14052615 | 0.3488408 |  |
| RNA-con-RNA-P3 | hsa-miR-10b-5p   | 15617308 | 17985385 | 1428  | 1818  | 91.437 | 101.082 | 0.14467757 | 0.0045258 |  |
| RNA-con-RNA-P3 | hsa-miR-181b-5p  | 15617308 | 17985385 | 10719 | 13741 | 686.35 | 764.009 | 0.15463736 | 7.87E-17  |  |
| RNA-con-RNA-P3 | hsa-miR-625-5p   | 15617308 | 17985385 | 35    | 45    | 2.2411 | 2.502   | 0.15887476 | 0.6343452 |  |
| RNA-con-RNA-P3 | hsa-miR-96-5p    | 15617308 | 17985385 | 124   | 160   | 7.9399 | 8.8961  | 0.16405217 | 0.3447056 |  |
| RNA-con-RNA-P3 | hsa-miR-136-3p   | 15617308 | 17985385 | 23    | 30    | 1.4727 | 1.668   | 0.17965572 | 0.6653017 |  |
| RNA-con-RNA-P3 | hsa-miR-197-5p   | 15617308 | 17985385 | 16    | 21    | 1.0245 | 1.1676  | 0.18862613 | 0.7087368 |  |
| RNA-con-RNA-P3 | hsa-miR-146b-5p  | 15617308 | 17985385 | 676   | 888   | 43.285 | 49.3734 | 0.18985684 | 0.0098346 |  |
| RNA-con-RNA-P3 | hsa-miR-10a-3p   | 15617308 | 17985385 | 19    | 25    | 1.2166 | 1.39    | 0.19222997 | 0.675114  |  |
| RNA-con-RNA-P3 | hsa-miR-377-3p   | 15617308 | 17985385 | 44    | 59    | 2.8174 | 3.2804  | 0.21950734 | 0.4515775 |  |
| RNA-con-RNA-P3 | hsa-miR-409-5p   | 15617308 | 17985385 | 187   | 252   | 11.974 | 14.0114 | 0.22670799 | 0.1037574 |  |
| RNA-con-RNA-P3 | hsa-miR-22-5p    | 15617308 | 17985385 | 474   | 639   | 30.351 | 35.5288 | 0.22724966 | 0.0092385 |  |
| RNA-con-RNA-P3 | hsa-miR-1294     | 15617308 | 17985385 | 17    | 23    | 1.0885 | 1.2788  | 0.23244924 | 0.6288371 |  |
| RNA-con-RNA-P3 | hsa-miR-193a-5p  | 15617308 | 17985385 | 89    | 121   | 5.6988 | 6.7277  | 0.23945521 | 0.2367812 |  |
| RNA-con-RNA-P3 | hsa-miR-27a-3p   | 15617308 | 17985385 | 5822  | 8022  | 372.79 | 446.029 | 0.2587679  | 1.33E-25  |  |
| RNA-con-RNA-P3 | hsa-let-7e-3p    | 15617308 | 17985385 | 13    | 18    | 0.8324 | 1.0008  | 0.26580482 | 0.6296867 |  |
| RNA-con-RNA-P3 | hsa-miR-487a     | 15617308 | 17985385 | 18    | 25    | 1.1526 | 1.39    | 0.27019296 | 0.5577633 |  |
| RNA-con-RNA-P3 | hsa-miR-135b-5p  | 15617308 | 17985385 | 126   | 175   | 8.068  | 9.7301  | 0.27024355 | 0.1092122 |  |
| RNA-con-RNA-P3 | hsa-miR-548a-3p  | 15617308 | 17985385 | 23    | 32    | 1.4727 | 1.7792  | 0.27276512 | 0.4998755 |  |
| RNA-con-RNA-P3 | hsa-miR-4488     | 15617308 | 17985385 | 553   | 772   | 35.409 | 42.9237 | 0.27764204 | 0.0005282 |  |
| RNA-con-RNA-P3 | hsa-miR-23b-3p   | 15617308 | 17985385 | 2436  | 3402  | 155.98 | 189.154 | 0.27818978 | 2.96E-13  |  |
| RNA-con-RNA-P3 | hsa-miR-154-3p   | 15617308 | 17985385 | 110   | 154   | 7.0435 | 8.5625  | 0.28173958 | 0.1182024 |  |
| RNA-con-RNA-P3 | hsa-miR-455-3p   | 15617308 | 17985385 | 146   | 205   | 9.3486 | 11.3981 | 0.28597112 | 0.0670929 |  |
| RNA-con-RNA-P3 | hsa-miR-34c-5p   | 15617308 | 17985385 | 151   | 213   | 9.6688 | 11.8429 | 0.29261365 | 0.0563914 |  |
| RNA-con-RNA-P3 | hsa-miR-365b-5p  | 15617308 | 17985385 | 51    | 72    | 3.2656 | 4.0033  | 0.29384165 | 0.2693873 |  |
| RNA-con-RNA-P3 | hsa-miR-23a-5p   | 15617308 | 17985385 | 84    | 120   | 5.3786 | 6.6721  | 0.31091021 | 0.1305338 |  |
| RNA-con-RNA-P3 | hsa-miR-151b     | 15617308 | 17985385 | 14    | 20    | 0.8964 | 1.112   | 0.31094223 | 0.5517328 |  |
| RNA-con-RNA-P3 | hsa-miR-362-3p   | 15617308 | 17985385 | 34    | 49    | 2.1771 | 2.7244  | 0.32353086 | 0.3206376 |  |
| RNA-con-RNA-P3 | hsa-miR-424-5p   | 15617308 | 17985385 | 257   | 374   | 16.456 | 20.7947 | 0.33759341 | 0.0037396 |  |



|                |                  |          |          |       |       |        |         |            |           |  |
|----------------|------------------|----------|----------|-------|-------|--------|---------|------------|-----------|--|
| RNA-con-RNA-P3 | hsa-miR-589-3p   | 15617308 | 17985385 | 30    | 44    | 1.9209 | 2.4464  | 0.3488779  | 0.3130569 |  |
| RNA-con-RNA-P3 | hsa-miR-376a-3p  | 15617308 | 17985385 | 121   | 178   | 7.7478 | 9.8969  | 0.35318999 | 0.03735   |  |
| RNA-con-RNA-P3 | hsa-miR-942      | 15617308 | 17985385 | 38    | 56    | 2.4332 | 3.1136  | 0.35572871 | 0.2444301 |  |
| RNA-con-RNA-P3 | hsa-miR-92a-3p   | 15617308 | 17985385 | 2520  | 3729  | 161.36 | 207.335 | 0.36168605 | 1.29E-22  |  |
| RNA-con-RNA-P3 | hsa-let-7d-3p    | 15617308 | 17985385 | 73    | 109   | 4.6743 | 6.0605  | 0.37468649 | 0.0859699 |  |
| RNA-con-RNA-P3 | hsa-miR-10a-5p   | 15617308 | 17985385 | 2681  | 4020  | 171.67 | 223.515 | 0.38074502 | 1.56E-26  |  |
| RNA-con-RNA-P3 | hsa-miR-195-5p   | 15617308 | 17985385 | 21    | 33    | 1.3447 | 1.8348  | 0.44833847 | 0.2717028 |  |
| RNA-con-RNA-P3 | hsa-miR-129-5p   | 15617308 | 17985385 | 84    | 133   | 5.3786 | 7.3949  | 0.45929994 | 0.0217644 |  |
| RNA-con-RNA-P3 | hsa-miR-122-5p   | 15617308 | 17985385 | 48    | 76    | 3.0735 | 4.2257  | 0.45930786 | 0.0841209 |  |
| RNA-con-RNA-P3 | hsa-miR-193b-3p  | 15617308 | 17985385 | 32    | 51    | 2.049  | 2.8356  | 0.46873405 | 0.1512934 |  |
| RNA-con-RNA-P3 | hsa-miR-27a-5p   | 15617308 | 17985385 | 32    | 51    | 2.049  | 2.8356  | 0.46873405 | 0.1512934 |  |
| RNA-con-RNA-P3 | hsa-miR-582-3p   | 15617308 | 17985385 | 13    | 21    | 0.8324 | 1.1676  | 0.48819725 | 0.3488625 |  |
| RNA-con-RNA-P3 | hsa-miR-423-5p   | 15617308 | 17985385 | 7905  | 12894 | 506.17 | 716.915 | 0.50218316 | 3.75E-134 |  |
| RNA-con-RNA-P3 | hsa-miR-532-3p   | 15617308 | 17985385 | 76    | 125   | 4.8664 | 6.9501  | 0.51417883 | 0.0136714 |  |
| RNA-con-RNA-P3 | hsa-miR-1293     | 15617308 | 17985385 | 18    | 30    | 1.1526 | 1.668   | 0.53322736 | 0.2199173 |  |
| RNA-con-RNA-P3 | hsa-miR-16-5p    | 15617308 | 17985385 | 4761  | 8003  | 304.85 | 444.972 | 0.5455969  | 2.52E-97  |  |
| RNA-con-RNA-P3 | hsa-miR-760      | 15617308 | 17985385 | 44    | 75    | 2.8174 | 4.1701  | 0.56571758 | 0.0379874 |  |
| RNA-con-RNA-P3 | hsa-miR-541-5p   | 15617308 | 17985385 | 41    | 70    | 2.6253 | 3.892   | 0.56802942 | 0.0443461 |  |
| RNA-con-RNA-P3 | hsa-miR-4707-3p  | 15617308 | 17985385 | 14    | 24    | 0.8964 | 1.3344  | 0.57397664 | 0.2435038 |  |
| RNA-con-RNA-P3 | hsa-miR-3934-5p  | 15617308 | 17985385 | 18    | 31    | 1.1526 | 1.7236  | 0.58053308 | 0.177641  |  |
| RNA-con-RNA-P3 | hsa-miR-23a-3p   | 15617308 | 17985385 | 19319 | 33292 | 1237   | 1851.06 | 0.58147583 | 0         |  |
| RNA-con-RNA-P3 | hsa-miR-1224-5p  | 15617308 | 17985385 | 11    | 19    | 0.7043 | 1.0564  | 0.58489422 | 0.2948036 |  |
| RNA-con-RNA-P3 | hsa-miR-548t-5p  | 15617308 | 17985385 | 20    | 35    | 1.2806 | 1.946   | 0.6036918  | 0.1369376 |  |
| RNA-con-RNA-P3 | hsa-miR-29b-3p   | 15617308 | 17985385 | 1906  | 3348  | 122.04 | 186.151 | 0.60907159 | 1.66E-50  |  |
| RNA-con-RNA-P3 | hsa-miR-181d     | 15617308 | 17985385 | 1373  | 2421  | 87.915 | 134.609 | 0.61459192 | 1.42E-37  |  |
| RNA-con-RNA-P3 | hsa-miR-34a-5p   | 15617308 | 17985385 | 17    | 30    | 1.0885 | 1.668   | 0.61577788 | 0.1623692 |  |
| RNA-con-RNA-P3 | hsa-miR-145-5p   | 15617308 | 17985385 | 70    | 125   | 4.4822 | 6.9501  | 0.63282671 | 0.0029534 |  |
| RNA-con-RNA-P3 | hsa-miR-361-3p   | 15617308 | 17985385 | 14    | 25    | 0.8964 | 1.39    | 0.63287033 | 0.1931903 |  |
| RNA-con-RNA-P3 | hsa-miR-331-3p   | 15617308 | 17985385 | 202   | 368   | 12.934 | 20.4611 | 0.66167058 | 1.01E-07  |  |
| RNA-con-RNA-P3 | hsa-miR-30c-5p   | 15617308 | 17985385 | 227   | 415   | 14.535 | 23.0743 | 0.66673596 | 1.24E-08  |  |
| RNA-con-RNA-P3 | hsa-miR-154-5p   | 15617308 | 17985385 | 70    | 130   | 4.4822 | 7.2281  | 0.68940944 | 0.0010735 |  |
| RNA-con-RNA-P3 | hsa-miR-449c-5p  | 15617308 | 17985385 | 45    | 84    | 2.8814 | 4.6705  | 0.69680705 | 0.0081371 |  |
| RNA-con-RNA-P3 | hsa-miR-218-1-3p | 15617308 | 17985385 | 16    | 30    | 1.0245 | 1.668   | 0.7031993  | 0.1159359 |  |
| RNA-con-RNA-P3 | hsa-miR-495-3p   | 15617308 | 17985385 | 680   | 1289  | 43.541 | 71.6693 | 0.71896747 | 7.14E-27  |  |
| RNA-con-RNA-P3 | hsa-miR-181c-5p  | 15617308 | 17985385 | 69    | 131   | 4.4182 | 7.2837  | 0.72121277 | 0.0006365 |  |
| RNA-con-RNA-P3 | hsa-miR-193a-3p  | 15617308 | 17985385 | 120   | 228   | 7.6838 | 12.677  | 0.7223215  | 6.14E-06  |  |
| RNA-con-RNA-P3 | hsa-miR-885-3p   | 15617308 | 17985385 | 42    | 80    | 2.6893 | 4.4481  | 0.72595852 | 0.0074542 |  |
| RNA-con-RNA-P3 | hsa-miR-641      | 15617308 | 17985385 | 16    | 31    | 1.0245 | 1.7236  | 0.75050502 | 0.0904725 |  |
| RNA-con-RNA-P3 | hsa-miR-181a-5p  | 15617308 | 17985385 | 5670  | 11004 | 363.06 | 611.83  | 0.75292826 | 6.17E-234 |  |
| RNA-con-RNA-P3 | hsa-miR-7-1-3p   | 15617308 | 17985385 | 17    | 33    | 1.0885 | 1.8348  | 0.75328141 | 0.0793586 |  |
| RNA-con-RNA-P3 | hsa-miR-4449     | 15617308 | 17985385 | 35    | 68    | 2.2411 | 3.7808  | 0.75448451 | 0.0108453 |  |

|                |                  |          |          |       |       |        |         |            |           |    |
|----------------|------------------|----------|----------|-------|-------|--------|---------|------------|-----------|----|
| RNA-con-RNA-P3 | hsa-miR-411-3p   | 15617308 | 17985385 | 70    | 137   | 4.4822 | 7.6173  | 0.76507269 | 0.0002355 |    |
| RNA-con-RNA-P3 | hsa-miR-431-3p   | 15617308 | 17985385 | 28    | 55    | 1.7929 | 3.058   | 0.77029338 | 0.0199352 |    |
| RNA-con-RNA-P3 | hsa-miR-615-5p   | 15617308 | 17985385 | 51    | 101   | 3.2656 | 5.6157  | 0.78211778 | 0.0013141 |    |
| RNA-con-RNA-P3 | hsa-miR-222-3p   | 15617308 | 17985385 | 16946 | 33798 | 1085.1 | 1879.19 | 0.79231384 | 0         |    |
| RNA-con-RNA-P3 | hsa-miR-100-3p   | 15617308 | 17985385 | 14    | 28    | 0.8964 | 1.5568  | 0.79636906 | 0.0910527 |    |
| RNA-con-RNA-P3 | hsa-miR-381-5p   | 15617308 | 17985385 | 10    | 21    | 0.6403 | 1.1676  | 0.8667262  | 0.1183745 |    |
| RNA-con-RNA-P3 | hsa-miR-1180     | 15617308 | 17985385 | 9     | 19    | 0.5763 | 1.0564  | 0.87426428 | 0.1357661 |    |
| RNA-con-RNA-P3 | hsa-miR-1307-3p  | 15617308 | 17985385 | 681   | 1446  | 43.606 | 80.3986 | 0.88266026 | 7.07E-42  |    |
| RNA-con-RNA-P3 | hsa-miR-324-3p   | 15617308 | 17985385 | 15    | 32    | 0.9605 | 1.7792  | 0.88937117 | 0.0464857 |    |
| RNA-con-RNA-P3 | hsa-miR-22-3p    | 15617308 | 17985385 | 1972  | 4250  | 126.27 | 236.303 | 0.90412374 | 1.93E-124 |    |
| RNA-con-RNA-P3 | hsa-miR-92b-5p   | 15617308 | 17985385 | 297   | 651   | 19.017 | 36.1961 | 0.92851424 | 2.37E-21  |    |
| RNA-con-RNA-P3 | hsa-miR-337-3p   | 15617308 | 17985385 | 17    | 38    | 1.0885 | 2.1128  | 0.9568148  | 0.0206863 |    |
| RNA-con-RNA-P3 | hsa-miR-29a-5p   | 15617308 | 17985385 | 59    | 133   | 3.7779 | 7.3949  | 0.96894612 | 9.58E-06  |    |
| RNA-con-RNA-P3 | hsa-miR-370      | 15617308 | 17985385 | 10    | 23    | 0.6403 | 1.2788  | 0.99797073 | 0.0652006 |    |
| RNA-con-RNA-P3 | hsa-miR-769-3p   | 15617308 | 17985385 | 10    | 23    | 0.6403 | 1.2788  | 0.99797073 | 0.0652006 |    |
| RNA-con-RNA-P3 | hsa-miR-31-3p    | 15617308 | 17985385 | 55    | 128   | 3.5217 | 7.1169  | 1.01497695 | 6.45E-06  | ** |
| RNA-con-RNA-P3 | hsa-miR-505-3p   | 15617308 | 17985385 | 11    | 26    | 0.7043 | 1.4456  | 1.03740642 | 0.0423474 | *  |
| RNA-con-RNA-P3 | hsa-miR-582-5p   | 15617308 | 17985385 | 11    | 27    | 0.7043 | 1.5012  | 1.09185421 | 0.0308942 | *  |
| RNA-con-RNA-P3 | hsa-miR-363-5p   | 15617308 | 17985385 | 7     | 18    | 0.4482 | 1.0008  | 1.15893914 | 0.0676627 |    |
| RNA-con-RNA-P3 | hsa-miR-197-3p   | 15617308 | 17985385 | 17    | 44    | 1.0885 | 2.4464  | 1.1683189  | 0.0033337 | ** |
| RNA-con-RNA-P3 | hsa-miR-19b-3p   | 15617308 | 17985385 | 118   | 309   | 7.5557 | 17.1806 | 1.1851431  | 1.65E-15  | ** |
| RNA-con-RNA-P3 | hsa-miR-15b-5p   | 15617308 | 17985385 | 900   | 2365  | 57.628 | 131.496 | 1.19016375 | 1.08E-108 | ** |
| RNA-con-RNA-P3 | hsa-miR-29c-5p   | 15617308 | 17985385 | 9     | 24    | 0.5763 | 1.3344  | 1.21129927 | 0.0275178 | *  |
| RNA-con-RNA-P3 | hsa-miR-146a-5p  | 15617308 | 17985385 | 18    | 51    | 1.1526 | 2.8356  | 1.29876211 | 0.0005825 | ** |
| RNA-con-RNA-P3 | hsa-miR-1306-5p  | 15617308 | 17985385 | 18    | 52    | 1.1526 | 2.8912  | 1.32677649 | 0.0004134 | ** |
| RNA-con-RNA-P3 | hsa-miR-539-5p   | 15617308 | 17985385 | 12    | 35    | 0.7684 | 1.946   | 1.34058229 | 0.003698  | ** |
| RNA-con-RNA-P3 | hsa-miR-92a-1-5p | 15617308 | 17985385 | 334   | 1019  | 21.387 | 56.6571 | 1.40555636 | 2.43E-61  | ** |
| RNA-con-RNA-P3 | hsa-miR-365a-3p  | 15617308 | 17985385 | 19    | 59    | 1.2166 | 3.2804  | 1.43101683 | 6.64E-05  | ** |
| RNA-con-RNA-P3 | hsa-miR-365b-3p  | 15617308 | 17985385 | 19    | 59    | 1.2166 | 3.2804  | 1.43101683 | 6.64E-05  | ** |
| RNA-con-RNA-P3 | hsa-miR-425-5p   | 15617308 | 17985385 | 20    | 64    | 1.2806 | 3.5584  | 1.47440878 | 2.13E-05  | ** |
| RNA-con-RNA-P3 | hsa-miR-4508     | 15617308 | 17985385 | 41    | 132   | 2.6253 | 7.3393  | 1.48316018 | 7.08E-10  | ** |
| RNA-con-RNA-P3 | hsa-miR-551b-3p  | 15617308 | 17985385 | 13    | 42    | 0.8324 | 2.3352  | 1.48819725 | 0.0005622 | ** |
| RNA-con-RNA-P3 | hsa-miR-221-5p   | 15617308 | 17985385 | 6164  | 22227 | 394.69 | 1235.84 | 1.64669527 | 0         | ** |
| RNA-con-RNA-P3 | hsa-miR-4521     | 15617308 | 17985385 | 13    | 47    | 0.8324 | 2.6132  | 1.65046867 | 8.20E-05  | ** |
| RNA-con-RNA-P3 | hsa-miR-129-2-3p | 15617308 | 17985385 | 25    | 92    | 1.6008 | 5.1153  | 1.67602578 | 2.03E-08  | ** |
| RNA-con-RNA-P3 | hsa-miR-1246     | 15617308 | 17985385 | 34    | 126   | 2.1771 | 7.0057  | 1.68612153 | 3.97E-11  | ** |
| RNA-con-RNA-P3 | hsa-miR-342-3p   | 15617308 | 17985385 | 214   | 813   | 13.703 | 45.2034 | 1.7219711  | 1.38E-65  | ** |
| RNA-con-RNA-P3 | hsa-miR-550a-3p  | 15617308 | 17985385 | 6     | 24    | 0.3842 | 1.3344  | 1.79626177 | 0.0032354 | ** |
| RNA-con-RNA-P3 | hsa-miR-7-5p     | 15617308 | 17985385 | 46    | 185   | 2.9455 | 10.2861 | 1.80411163 | 4.36E-17  | ** |
| RNA-con-RNA-P3 | hsa-miR-935      | 15617308 | 17985385 | 15    | 63    | 0.9605 | 3.5028  | 1.8666511  | 6.28E-07  | ** |
| RNA-con-RNA-P3 | hsa-miR-299-5p   | 15617308 | 17985385 | 92    | 395   | 5.8909 | 21.9623 | 1.89846918 | 3.82E-37  | ** |

|                |                  |          |          |     |      |        |         |            |           |    |
|----------------|------------------|----------|----------|-----|------|--------|---------|------------|-----------|----|
| RNA-con-RNA-P3 | hsa-miR-132-3p   | 15617308 | 17985385 | 6   | 26   | 0.3842 | 1.4456  | 1.91173899 | 0.0013642 | ** |
| RNA-con-RNA-P3 | hsa-miR-487b     | 15617308 | 17985385 | 337 | 1467 | 21.579 | 81.5662 | 1.91837017 | 3.58E-135 | ** |
| RNA-con-RNA-P3 | hsa-miR-129-1-3p | 15617308 | 17985385 | 7   | 31   | 0.4482 | 1.7236  | 1.94321045 | 0.0003865 | ** |
| RNA-con-RNA-P3 | hsa-miR-4454     | 15617308 | 17985385 | 7   | 33   | 0.4482 | 1.8348  | 2.03340826 | 0.0001592 | ** |
| RNA-con-RNA-P3 | hsa-miR-335-3p   | 15617308 | 17985385 | 8   | 39   | 0.5123 | 2.1684  | 2.08157012 | 2.91E-05  | ** |
| RNA-con-RNA-P3 | hsa-miR-3676-3p  | 15617308 | 17985385 | 4   | 21   | 0.2561 | 1.1676  | 2.18876696 | 0.0018331 | ** |
| RNA-con-RNA-P3 | hsa-miR-155-5p   | 15617308 | 17985385 | 249 | 1308 | 15.944 | 72.7257 | 2.18946976 | 8.87E-143 | ** |
| RNA-con-RNA-P3 | hsa-miR-29b-1-5p | 15617308 | 17985385 | 22  | 120  | 1.4087 | 6.6721  | 2.24377651 | 7.26E-15  | ** |
| RNA-con-RNA-P3 | hsa-miR-4657     | 15617308 | 17985385 | 6   | 38   | 0.3842 | 2.1128  | 2.45922678 | 5.10E-06  | ** |
| RNA-con-RNA-P3 | hsa-miR-576-5p   | 15617308 | 17985385 | 5   | 34   | 0.3202 | 1.8904  | 2.56164632 | 1.06E-05  | ** |
| RNA-con-RNA-P3 | hsa-miR-431-5p   | 15617308 | 17985385 | 11  | 75   | 0.7043 | 4.1701  | 2.56581999 | 3.42E-11  | ** |
| RNA-con-RNA-P3 | hsa-miR-3654     | 15617308 | 17985385 | 6   | 43   | 0.3842 | 2.3908  | 2.63756402 | 4.28E-07  | ** |
| RNA-con-RNA-P3 | hsa-let-7b-3p    | 15617308 | 17985385 | 10  | 79   | 0.6403 | 4.3925  | 2.77822237 | 1.20E-12  | ** |
| RNA-con-RNA-P3 | hsa-miR-18a-3p   | 15617308 | 17985385 | 4   | 34   | 0.2561 | 1.8904  | 2.88391238 | 2.76E-06  | ** |
| RNA-con-RNA-P3 | hsa-miR-5096     | 15617308 | 17985385 | 2   | 18   | 0.1281 | 1.0008  | 2.96581131 | 0.0007077 | ** |
| RNA-con-RNA-P3 | hsa-miR-362-5p   | 15617308 | 17985385 | 5   | 45   | 0.3202 | 2.502   | 2.96603658 | 3.77E-08  | ** |
| RNA-con-RNA-P3 | hsa-miR-204-5p   | 15617308 | 17985385 | 16  | 164  | 1.0245 | 9.1185  | 3.15387654 | 5.54E-28  | ** |
| RNA-con-RNA-P3 | hsa-miR-6087     | 15617308 | 17985385 | 21  | 217  | 1.3447 | 12.0654 | 3.16551949 | 1.07E-36  | ** |
| RNA-con-RNA-P3 | hsa-miR-664a-3p  | 15617308 | 17985385 | 2   | 33   | 0.1281 | 1.8348  | 3.84028043 | 1.71E-07  | ** |
| RNA-con-RNA-P3 | hsa-miR-3614-3p  | 15617308 | 17985385 | 1   | 19   | 0.064  | 1.0564  | 4.04494049 | 7.67E-05  | ** |
| RNA-con-RNA-P3 | hsa-miR-887      | 15617308 | 17985385 | 4   | 121  | 0.2561 | 6.7277  | 4.71533422 | 7.40E-28  | ** |
| RNA-con-RNA-P3 | hsa-miR-3674     | 15617308 | 17985385 | 1   | 80   | 0.064  | 4.4481  | 6.11897351 | 7.95E-21  | ** |
| RNA-con-RNA-P3 | hsa-miR-3614-5p  | 15617308 | 17985385 | 1   | 99   | 0.064  | 5.5045  | 6.42639581 | 6.79E-26  | ** |
| RNA-con-RNA-P3 | hsa-miR-155-3p   | 15617308 | 17985385 | 0   | 31   | 0.01   | 1.7236  | 7.42928119 | 4.12E-09  | ** |
| RNA-con-RNA-P3 | hsa-miR-206      | 15617308 | 17985385 | 12  | 3268 | 0.7684 | 181.703 | 7.8855098  | 0         | ** |
| RNA-con-RNA-P3 | hsa-miR-3687     | 15617308 | 17985385 | 2   | 764  | 0.1281 | 42.4789 | 8.37333212 | 2.77E-203 | ** |
| RNA-con-RNA-P3 | hsa-miR-3648     | 15617308 | 17985385 | 2   | 817  | 0.1281 | 45.4258 | 8.47009764 | 1.30E-217 | ** |
| RNA-con-RNA-P3 | hsa-miR-663a     | 15617308 | 17985385 | 0   | 124  | 0.01   | 6.8945  | 9.42930212 | 2.34E-34  | ** |

Table S1. MiRNA profile results. Human astrocytoma cells (U251) were mock infected or infected with JEV P3 (MOI = 5) for 36h. The cellular total RNAs were extracted using TRIzol Reagent (Invitrogen), and subjected to high throughput sequencing by Illumina Genome Analyzer.
